# Supplementary material for: Supplementation of PUFA extracted from microalgae for the development of chicken patties
Source: PeerJ. 2023 May 24;11:e15355. doi: 10.7717/peerj.15355 (PMC10224672; doi:10.7717/peerj.15355)
Supplement: Supplemental Information 1 [file peerj-11-15355-s001.xlsx]

## Sheet: Mean+Replicates
Moisture	T0				T1				T2				T3
Days	R1	R2	R3	Mean	R1	R2	R3	Mean	R1	R2	R3	Mean	R1	R2	R3	Mean
0	67.24	67.25	67.25	67.2467	66.29	66.28	66.29	66.2867	64.82	64.83	64.82	64.8233	64.16	64.15	64.16	64.1567
10	67.53	67.52	67.52	67.5233	66.5	66.51	66.5	66.5033	65	65.01	65.01	65.0067	64.2	64.3	64.3	64.2667
20	67.63	67.63	67.63	67.63	66.68	66.67	66.68	66.6767	64.3	64.4	64.4	64.3667	64.5	64.4	64.4	64.4333
30	68.06	68.07	68.07	68.0667	67.14	67.14	67.13	67.1367	64.69	64.69	64.69	64.69	64.68	64.69	64.69	64.6867
Protein	T0				T1				T2				T3
Days	R1	R2	R3	Mean	R1	R2	R3	Mean	R1	R2	R3	Mean	R1	R2	R3	Mean
0	16.94	16.93	16.94	16.9367	16.6	16.6	16.6	16.6	16.22	16.23	16.22	16.2233	16.13	16.12	16.12	16.1233
10	16.85	16.86	16.85	16.8533	16.4	16.4	16.5	16.4333	16.17	16.16	16.17	16.1667	16.09	16.08	16.09	16.0867
20	16.72	16.71	16.72	16.7167	16.36	16.37	16.37	16.3667	16.15	16.16	16.15	16.1533	16.05	16.06	16.06	16.0567
30	16.64	16.65	16.64	16.6433	16.32	16.31	16.31	16.3133	16.14	16.14	16.15	16.1433	16.02	16.01	16.01	16.0133
Fat	T0				T1				T2				T3
Days	R1	R2	R3	Mean	R1	R2	R3	Mean	R1	R2	R3	Mean	R1	R2	R3	Mean
0	26.27	26.26	26.26	26.2633	26.27	26.28	26.28	26.2767	26.31	26.32	26.32	26.3167	26.62	26.63	26.62	26.6233
10	26.37	26.36	26.37	26.3667	26.49	26.48	26.49	26.4867	26.41	26.42	26.41	26.4133	26.38	26.39	26.39	26.3867
20	26.56	26.57	26.57	26.5667	26.36	26.35	26.36	26.3567	26.37	26.37	26.37	26.37	26.14	26.14	26.13	26.1367
30	26.34	26.35	26.34	26.3433	26.41	26.41	26.4	26.4067	26.48	26.47	26.48	26.4767	26.41	26.41	26.41	26.41
C.Loss	T0				T1				T2				T3
Days	R1	R2	R3	Mean	R1	R2	R3	Mean	R1	R2	R3	Mean	R1	R2	R3	Mean
0	29.16	29.15	29.15	29.1533	29.1	29.2	29.1	29.1333	30.34	30.34	30.34	30.34	30.51	30.52	30.52	30.5167
10	29.5	29.49	29.5	29.4967	29.11	29.1	29.11	29.1067	30.66	30.66	30.67	30.6633	30.15	30.15	30.14	30.1467
20	29.53	29.54	29.54	29.5367	29.18	29.18	29.18	29.18	30.75	30.74	30.75	30.7467	30.14	30.14	30.14	30.14
30	29.56	29.56	29.55	29.5567	29.54	29.55	29.55	29.5467	31.74	31.75	31.75	31.7467	31.12	31.12	31.13	31.1233
Fat Absorption	T0				T1				T2				T3
Days	R1	R2	R3	Mean	R1	R2	R3	Mean	R1	R2	R3	Mean	R1	R2	R3	Mean
0	4.9	4.8	4.9	4.86667	5.25	5.24	5.25	5.24667	5.57	5.57	5.58	5.57333	5.87	5.87	5.88	5.87333
10	4.87	4.87	4.87	4.87	5.2	5.19	5.19	5.19333	5.42	5.43	5.42	5.42333	5.82	5.82	5.81	5.81667
20	4.83	4.82	4.82	4.82333	5.12	5.13	5.12	5.12333	5.29	5.29	5.28	5.28667	5.9	5.8	5.8	5.83333
30	4.77	4.77	4.77	4.77	4.97	4.98	4.98	4.97667	5.28	5.28	5.28	5.28	5.72	5.72	5.73	5.72333
pH	T0				T1				T2				T3
Days	R1	R2	R3	Mean	R1	R2	R3	Mean	R1	R2	R3	Mean	R1	R2	R3	Mean
0	5.95	5.94	5.94	5.94333	5.78	5.78	5.78	5.78	5.56	5.56	5.55	5.55667	5.14	5.14	5.13	5.13667
10	5.64	5.64	5.64	5.64	5.56	5.56	5.57	5.56333	5.51	5.5	5.5	5.50333	5.3	5.4	5.4	5.36667
20	5.55	5.55	5.56	5.55333	5.5	5.51	5.51	5.50667	5.51	5.51	5.51	5.51	5.5	5.5	5.5	5.5
30	5.44	5.45	5.45	5.44667	5.42	5.42	5.43	5.42333	5.37	5.38	5.38	5.37667	5.33	5.32	5.33	5.32667
TBARS	T0				T1				T2				T3
Days	R1	R2	R3	Mean	R1	R2	R3	Mean	R1	R2	R3	Mean	R1	R2	R3	Mean
0	0.65	0.65	0.65	0.65	1.2	1.1	1.1	1.13333	1.44	1.45	1.45	1.44667	1.71	1.72	1.71	1.71333
10	0.82	0.83	0.83	0.826667	1.15	1.15	1.15	1.15	1.5	1.5	1.5	1.5	1.82	1.82	1.82	1.82
20	0.96	0.97	0.96	0.963333	1.22	1.22	1.23	1.22333	1.58	1.57	1.58	1.57667	1.88	1.88	1.88	1.88
30	1.02	1.02	1.02	1.02	1.28	1.29	1.29	1.28667	1.62	1.63	1.62	1.62333	1.8	1.9	1.9	1.86667
TPC	T0				T1				T2				T3
Days	R1	R2	R3	Mean	R1	R2	R3	Mean	R1	R2	R3	Mean	R1	R2	R3	Mean
0	6.43	6.44	6.44	6.43667	6.68	6.69	6.68	6.68333	6.66	6.66	6.66	6.66	6.6	6.7	6.7	6.66667
10	6.4	6.4	6.4	6.4	6.69	6.69	6.68	6.68667	6.64	6.64	6.63	6.63667	6.73	6.72	6.73	6.72667
20	6.53	6.52	6.52	6.52333	6.71	6.72	6.71	6.71333	6.7	6.71	6.71	6.70667	6.85	6.85	6.85	6.85
30	6.58	6.59	6.58	6.58333	6.72	6.73	6.73	6.72667	6.74	6.73	6.74	6.73667	6.89	6.9	6.89	6.89333
Y&M	T0				T1				T2				T3
Days	R1	R2	R3	Mean	R1	R2	R3	Mean	R1	R2	R3	Mean	R1	R2	R3	Mean
0	0	0	0	0	0	0	0	0	0	0	0	0	0	0	0	0
10	0.71	0.71	0.72	0.713333	0.78	0.77	0.78	0.776667	0.85	0.85	0.85	0.85	0.6	0.5	0.6	0.566667
20	0.79	0.78	0.79	0.786667	0.78	0.79	0.79	0.786667	0.93	0.94	0.94	0.936667	0.8	0.8	0.8	0.8
30	0.78	0.79	0.79	0.786667	0.8	0.8	0.7	0.766667	0.98	0.97	0.98	0.976667	0.8	0.9	0.9	0.866667
Texture	T0				T1				T2				T3
Days	R1	R2	R3	Mean	R1	R2	R3	Mean	R1	R2	R3	Mean	R1	R2	R3	Mean
0	8.56	8.56	8.56	8.56	8.21	8.2	8.21	8.20667	7.86	7.85	7.85	7.85333	7.66	7.66	7.65	7.65667
10	8.55	8.55	8.55	8.55	8.02	8.03	8.03	8.02667	7.83	7.83	7.83	7.83	7.59	7.59	7.59	7.59
20	8.4	8.5	8.5	8.46667	7.91	7.91	7.9	7.90667	7.77	7.78	7.78	7.77667	7.42	7.43	7.43	7.42667
30	8.4	8.4	8.4	8.4	7.9	7.9	7.9	7.9	7.72	7.73	7.72	7.72333	7.23	7.23	7.23	7.23
Taste	T0				T1				T2				T3
Days	R1	R2	R3	Mean	R1	R2	R3	Mean	R1	R2	R3	Mean	R1	R2	R3	Mean
0	8.52	8.51	8.52	8.51667	7.99	7.99	7.98	7.98667	7.69	7.69	7.68	7.68667	7.21	7.22	7.22	7.21667
10	8.31	8.31	8.31	8.31	7.86	7.86	7.86	7.86	7.65	7.64	7.64	7.64333	7.2	7.2	7.3	7.23333
20	8.18	8.18	8.19	8.18333	7.8	7.8	7.8	7.8	7.5	7.5	7.5	7.5	7.18	7.18	7.18	7.18
30	8.13	8.13	8.13	8.13	7.72	7.73	7.72	7.72333	7.36	7.35	7.35	7.35333	7.15	7.16	7.15	7.15333
Colour	T0				T1				T2				T3
Days	R1	R2	R3	Mean	R1	R2	R3	Mean	R1	R2	R3	Mean	R1	R2	R3	Mean
0	8.68	8.67	8.68	8.67667	8.1	8.1	8.1	8.1	7.73	7.74	7.73	7.73333	7.49	7.48	7.48	7.48333
10	8.42	8.41	8.41	8.41333	8	8	8	8	7.68	7.68	7.67	7.67667	7.33	7.32	7.33	7.32667
20	8.28	8.29	8.28	8.28333	7.92	7.91	7.92	7.91667	7.58	7.57	7.58	7.57667	7.28	7.29	7.29	7.28667
30	8.21	8.2	8.21	8.20667	7.82	7.81	7.82	7.81667	7.53	7.54	7.54	7.53667	7.21	7.21	7.2	7.20667
Odour	T0				T1				T2				T3
Days	R1	R2	R3	Mean	R1	R2	R3	Mean	R1	R2	R3	Mean	R1	R2	R3	Mean
0	8.6	8.6	8.6	8.6	8.28	8.29	8.28	8.28333	7.82	7.81	7.82	7.81667	7.55	7.56	7.56	7.55667
10	8.53	8.53	8.54	8.53333	8.2	8.2	8.2	8.2	7.8	7.8	7.8	7.8	7.5	7.5	7.5	7.5
20	8.46	8.47	8.47	8.46667	7.97	7.97	7.97	7.97	7.72	7.72	7.32	7.58667	7.39	7.39	7.38	7.38667
30	8.35	8.34	8.35	8.34667	7.86	7.85	7.86	7.85667	7.7	7.7	7.7	7.7	7.27	7.26	7.26	7.26333
O.A	T0				T1				T2				T3
Days	R1	R2	R3	Mean	R1	R2	R3	Mean	R1	R2	R3	Mean	R1	R2	R3	Mean
0	8.59	8.58	8.59	8.58667	8.11	8.1	8.11	8.10667	7.85	7.85	7.86	7.85333	7.4	7.41	7.41	7.40667
10	8.5	8.5	8.5	8.5	8.07	8.06	8.06	8.06333	7.73	7.74	7.74	7.73667	7.34	7.34	7.34	7.34
20	8.4	8.4	8.4	8.4	7.99	7.99	7.99	7.99	7.64	7.64	7.64	7.64	7.24	7.24	7.24	7.24
30	8.17	8.16	8.16	8.16333	7.92	7.93	7.92	7.92333	7.58	7.57	7.58	7.57667	7.12	7.12	7.13	7.12333
Ash	T0				T1				T2				T3
Days	R1	R2	R3	Mean	R1	R2	R3	Mean	R1	R2	R3	Mean	R1	R2	R3	Mean
0	2.14	2.15	2.15	2.14667	2.15	2.16	2.16	2.15667	2.14	2.15	2.15	2.14667	2.15	2.17	2.16	2.16
10	2.15	2.15	2.15	2.15	2.16	2.15	2.15	2.15333	2.18	2.16	2.16	2.16667	2.19	2.18	2.17	2.18
20	2.17	2.16	2.17	2.16667	2.16	2.16	2.16	2.16	2.16	2.16	2.16	2.16	2.18	2.18	2.17	2.17667
30	2.14	2.15	2.15	2.14667	2.15	2.14	2.14	2.14333	2.16	2.15	2.15	2.15333	2.15	2.16	2.16	2.15667

## Sheet: Coding
Treatments	Storage Time	Replicates		Moisture	Protein	Fats	C.Loss	Fat absorption	pH	TBARS	Texture	Colour	Taste	odor	O.A	Ash
1	1	1		67.24	16.94	26.27	29.16	4.9	5.95	0.65	8.56	8.68	8.52	8.6	8.59	2.14
1	2	1		67.53	16.85	26.37	29.5	4.87	5.64	0.82	8.55	8.42	8.31	8.53	8.5	2.15
1	3	1		67.63	16.72	26.56	29.53	4.83	5.55	0.96	8.4	8.28	8.18	8.46	8.4	2.17
1	4	1		68.06	16.64	26.34	29.56	4.77	5.44	1.02	8.4	8.21	8.13	8.35	8.17	2.14
1	1	2		67.25	16.93	26.26	29.15	4.8	5.94	0.65	8.56	8.67	8.51	8.6	8.58	2.15
1	2	2		67.52	16.86	26.36	29.49	4.87	5.64	0.83	8.55	8.41	8.31	8.53	8.5	2.15
1	3	2		67.63	16.71	26.57	29.54	4.82	5.55	0.97	8.5	8.29	8.18	8.47	8.4	2.16
1	4	2		68.07	16.65	26.35	29.56	4.77	5.45	1.02	8.4	8.2	8.13	8.34	8.16	2.15
1	1	3		67.25	16.94	26.26	29.15	4.9	5.94	0.65	8.56	8.68	8.52	8.6	8.59	2.15
1	2	3		67.52	16.85	26.37	29.5	4.87	5.64	0.83	8.55	8.41	8.31	8.54	8.5	2.15
1	3	3		67.63	16.72	26.57	29.54	4.82	5.56	0.96	8.5	8.28	8.19	8.47	8.4	2.17
1	4	3		68.07	16.64	26.34	29.55	4.77	5.45	1.02	8.4	8.21	8.13	8.35	8.16	2.15
2	1	1		66.29	16.6	26.27	29.1	5.25	5.78	1.2	8.21	8.1	7.99	8.28	8.11	2.15
2	2	1		66.5	16.4	26.49	29.11	5.2	5.56	1.15	8.02	8	7.86	8.2	8.07	2.16
2	3	1		66.68	16.36	26.36	29.18	5.12	5.5	1.22	7.91	7.92	7.8	7.97	7.99	2.16
2	4	1		67.14	16.32	26.41	29.54	4.97	5.42	1.28	7.9	7.82	7.72	7.86	7.92	2.15
2	1	2		66.28	16.6	26.28	29.2	5.24	5.78	1.1	8.2	8.1	7.99	8.29	8.1	2.16
2	2	2		66.51	16.4	26.48	29.1	5.19	5.56	1.15	8.03	8	7.86	8.2	8.06	2.15
2	3	2		66.67	16.37	26.35	29.18	5.13	5.51	1.22	7.91	7.91	7.8	7.97	7.99	2.16
2	4	2		67.14	16.31	26.41	29.55	4.98	5.42	1.29	7.9	7.81	7.73	7.85	7.93	2.14
2	1	3		66.29	16.6	26.28	29.1	5.25	5.78	1.1	8.21	8.1	7.98	8.28	8.11	2.16
2	2	3		66.5	16.5	26.49	29.11	5.19	5.57	1.15	8.03	8	7.86	8.2	8.06	2.15
2	3	3		66.68	16.37	26.36	29.18	5.12	5.51	1.23	7.9	7.92	7.8	7.97	7.99	2.16
2	4	3		67.13	16.31	26.4	29.55	4.98	5.43	1.29	7.9	7.82	7.72	7.86	7.92	2.14
3	1	1		64.82	16.22	26.31	30.34	5.57	5.56	1.44	7.86	7.73	7.69	7.82	7.85	2.14
3	2	1		65	16.17	26.41	30.66	5.42	5.51	1.5	7.83	7.68	7.65	7.8	7.73	2.18
3	3	1		64.3	16.15	26.37	30.75	5.29	5.51	1.58	7.77	7.58	7.5	7.72	7.64	2.16
3	4	1		64.69	16.14	26.48	31.74	5.28	5.37	1.62	7.72	7.53	7.36	7.7	7.58	2.16
3	1	2		64.83	16.23	26.32	30.34	5.57	5.56	1.45	7.85	7.74	7.69	7.81	7.85	2.15
3	2	2		65.01	16.16	26.42	30.66	5.43	5.5	1.5	7.83	7.68	7.64	7.8	7.74	2.16
3	3	2		64.4	16.16	26.37	30.74	5.29	5.51	1.57	7.78	7.57	7.5	7.72	7.64	2.16
3	4	2		64.69	16.14	26.47	31.75	5.28	5.38	1.63	7.73	7.54	7.35	7.7	7.57	2.15
3	1	3		64.82	16.22	26.32	30.34	5.58	5.55	1.45	7.85	7.73	7.68	7.82	7.86	2.15
3	2	3		65.01	16.17	26.41	30.67	5.42	5.5	1.5	7.83	7.67	7.64	7.8	7.74	2.16
3	3	3		64.4	16.15	26.37	30.75	5.28	5.51	1.58	7.78	7.58	7.5	7.32	7.64	2.16
3	4	3		64.69	16.15	26.48	31.75	5.28	5.38	1.62	7.72	7.54	7.35	7.7	7.58	2.15
4	1	1		64.16	16.13	26.62	30.51	5.87	5.14	1.71	7.66	7.49	7.21	7.55	7.4	2.15
4	2	1		64.2	16.09	26.38	30.15	5.82	5.3	1.82	7.59	7.33	7.2	7.5	7.34	2.19
4	3	1		64.5	16.05	26.14	30.14	5.9	5.5	1.88	7.42	7.28	7.18	7.39	7.24	2.18
4	4	1		64.68	16.02	26.41	31.12	5.72	5.33	1.8	7.23	7.21	7.15	7.27	7.12	2.15
4	1	2		64.15	16.12	26.63	30.52	5.87	5.14	1.72	7.66	7.48	7.22	7.56	7.41	2.17
4	2	2		64.3	16.08	26.39	30.15	5.82	5.4	1.82	7.59	7.32	7.2	7.5	7.34	2.18
4	3	2		64.4	16.06	26.14	30.14	5.8	5.5	1.88	7.43	7.29	7.18	7.39	7.24	2.18
4	4	2		64.69	16.01	26.41	31.12	5.72	5.32	1.9	7.23	7.21	7.16	7.26	7.12	2.16
4	1	3		64.16	16.12	26.62	30.52	5.88	5.13	1.71	7.65	7.48	7.22	7.56	7.41	2.16
4	2	3		64.3	16.09	26.39	30.14	5.81	5.4	1.82	7.59	7.33	7.3	7.5	7.34	2.17
4	3	3		64.4	16.06	26.13	30.14	5.8	5.5	1.88	7.43	7.29	7.18	7.38	7.24	2.17
4	4	3		64.69	16.01	26.41	31.13	5.73	5.33	1.9	7.23	7.2	7.15	7.26	7.13	2.16

## Sheet: Graphs
TPC
	T0	T1	T2	T3
0 Days	6.43667	6.68333	6.66	6.66667
10 Days	6.4	6.68667	6.63667	6.72667
20 Days	6.52333	6.71333	6.70667	6.85
30 Days	6.58333	6.72667	6.73667	6.89333
Y&M
	T0	T1	T2	T3
0 Days	0	0	0	0
10 Days	0.713333	0.776667	0.85	0.566667
20 Days	0.786667	0.786667	0.936667	0.8
30 Days	0.786667	0.766667	0.976667	0.866667
